# Supplementary material for: Polymorphism in N-(5-methylisoxazol-3-yl)malonamide: understanding the supramolecular structure and the crystallization mechanism
Source: Royal Society of Chemistry journal article supplement (doi:10.1039/d3ce00643c), 2023-01-01
Supplement: d3ce00643c1.pdf [file d3ce00643c1.pdf]

## Polymorphism in *N*-(5-methylisoxazol-3-yl)malonamide: Understanding the Supramolecular Structure and the Crystallization Mechanism

Anderson B. Pagliari†, Jéssica M. L. Rosa†, Priscila S. V. de Lima†, Geórgia C. Zimmer†, Maria E. C. da Silva†, Érica G. de Oliveira†, Helio G. Bonacorso†, Nilo Zanatta†, and Marcos A. P. Martins†\*

†Núcleo de Química de Heterociclos (NUQUIMHE), Department of Chemistry, Federal University of Santa Maria (UFSM), 97105-900, Santa Maria, RS, Brazil

\*E-mail of the corresponding author: [marcos.nuquimhe@gmail.com](mailto:marcos.nuquimhe@gmail.com)

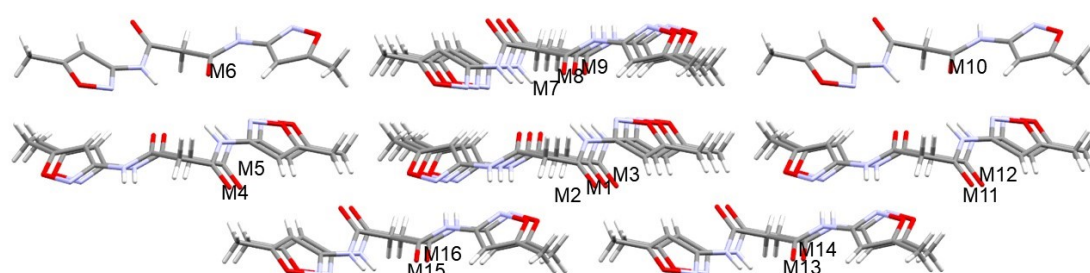

Fig. S1. Supramolecular cluster of the compound **11**.

Table S1. Topological and energetic data of each dimer from the supramolecular cluster of compound **11**.

| Dimer  | Symmetry code   | $C_{M1 \cdots MN}$ (Å <sup>2</sup> ) | $G_{M1 \cdots MN}$ (kcal mol <sup>-1</sup> ) | $NC_{M1 \cdots MN}$ | $NG_{M1 \cdots MN}$ |
|--------|-----------------|--------------------------------------|----------------------------------------------|---------------------|---------------------|
| M1     | $x,y,z$         |                                      |                                              |                     |                     |
| M1⋯M2  | $1+x,y,z$       | 44.33                                | -9.88                                        | 2.03                | 1.98                |
| M1⋯M3  | $-1+x,y,z$      | 44.33                                | -9.88                                        | 2.03                | 1.98                |
| M1⋯M4  | $1+x,1+y,-1+z$  | 9.36                                 | -0.99                                        | 0.43                | 0.20                |
| M1⋯M5  | $x,1+y,-1+z$    | 8.7                                  | 0.02                                         | 0.40                | 0.00                |
| M1⋯M6  | $1-x,2-y,-z$    | 3.55                                 | -0.12                                        | 0.16                | 0.02                |
| M1⋯M7  | $2-x,1-y,1-z$   | 5.03                                 | -1.37                                        | 0.23                | 0.28                |
| M1⋯M8  | $1-x,1-y,1-z$   | 48.03                                | -13.72                                       | 2.20                | 2.75                |
| M1⋯M9  | $-x,1-y,1-z$    | 36.92                                | -3.16                                        | 1.69                | 0.63                |
| M1⋯M10 | $-x,-y,2-z$     | 2.15                                 | -0.41                                        | 0.10                | 0.08                |
| M1⋯M11 | $x,-1+y,1+z$    | 8.7                                  | 0.02                                         | 0.40                | 0.00                |
| M1⋯M12 | $-1+x,-1+y,1+z$ | 9.36                                 | -0.99                                        | 0.43                | 0.20                |
| M1⋯M13 | $1-x,1-y,2-z$   | 23.14                                | -4.44                                        | 1.06                | 0.89                |
| M1⋯M14 | $-x,1-y,2-z$    | 23.22                                | -5.29                                        | 1.07                | 1.06                |
| M1⋯M15 | $2-x,2-y,1-z$   | 21.23                                | -15.43                                       | 0.97                | 3.10                |
| M1⋯M16 | $1-x,2-y,1-z$   | 38.9                                 | -9.10                                        | 1.78                | 1.83                |
| Total  |                 | 326.95                               | -74.75                                       | 15.00               | 15.00               |

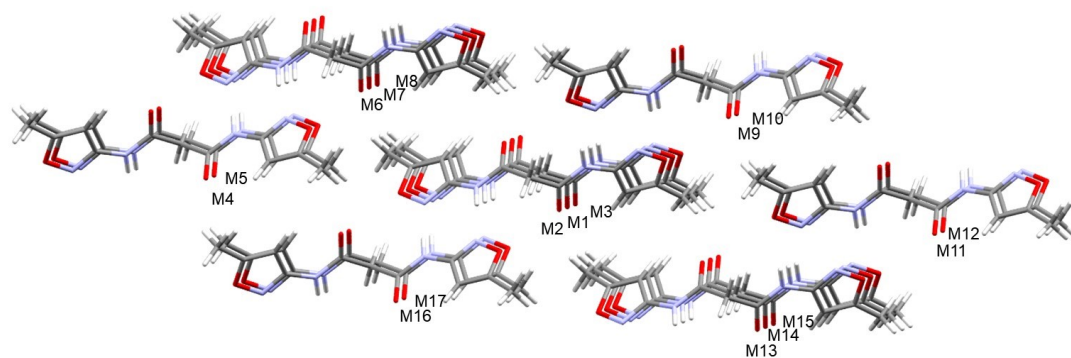

Fig. S2. Supramolecular cluster of the compound **III**.

Table S2. Topological and energetic data of each dimer from the supramolecular cluster of compound **III**.

| Dimer           | Symmetry code          | $C_{M1 \cdots MN}$ ( $\text{\AA}^2$ ) | $G_{M1 \cdots MN}$ ( $\text{kcal mol}^{-1}$ ) | $NC_{M1 \cdots MN}$ | $NG_{M1 \cdots MN}$ |
|-----------------|------------------------|---------------------------------------|-----------------------------------------------|---------------------|---------------------|
| M1              | $x, y, z$              |                                       |                                               |                     |                     |
| M1 $\cdots$ M2  | $x, -1+y, z$           | 52.38                                 | -11.96                                        | 2.51                | 2.43                |
| M1 $\cdots$ M3  | $x, 1+y, z$            | 52.38                                 | -11.96                                        | 2.51                | 2.43                |
| M1 $\cdots$ M4  | $-2-x, 1-y, 1-z$       | 11.28                                 | -2.28                                         | 0.54                | 0.46                |
| M1 $\cdots$ M5  | $-1, 5+x, 2-y, -1/2+z$ | 9.07                                  | -0.29                                         | 0.44                | 0.06                |
| M1 $\cdots$ M6  | $-1+x, -1+y, z$        | 8.3                                   | -1.45                                         | 0.40                | 0.30                |
| M1 $\cdots$ M7  | $-1+x, y, z$           | 27.49                                 | -4.79                                         | 1.32                | 0.97                |
| M1 $\cdots$ M8  | $-1+x, 1+y, z$         | 8.3                                   | -1.45                                         | 0.40                | 0.30                |
| M1 $\cdots$ M9  | $-x, -y, 2-z$          | 21.7                                  | -14.48                                        | 1.04                | 2.95                |
| M1 $\cdots$ M10 | $-x, 1-y, 2-z$         | 28.27                                 | -2.63                                         | 1.36                | 0.53                |
| M1 $\cdots$ M11 | $1-x, 1-y, 2-z$        | 11.28                                 | -2.28                                         | 0.54                | 0.46                |
| M1 $\cdots$ M12 | $1-x, 2-y, 2-z$        | 9.07                                  | -0.29                                         | 0.44                | 0.06                |
| M1 $\cdots$ M13 | $1+x, -1+y, z$         | 8.3                                   | -1.45                                         | 0.40                | 0.30                |
| M1 $\cdots$ M14 | $1+x, y, z$            | 27.49                                 | -4.79                                         | 1.32                | 0.97                |
| M1 $\cdots$ M15 | $1+x, 1+y, z$          | 8.3                                   | -1.45                                         | 0.40                | 0.30                |
| M1 $\cdots$ M16 | $-1-x, -y, 1-z$        | 21.7                                  | -14.48                                        | 1.04                | 2.95                |
| M1 $\cdots$ M17 | $-1-x, 1-y, 1-z$       | 28.27                                 | -2.63                                         | 1.36                | 0.53                |
| Total           |                        | 334.00                                | -79.00                                        | 16.00               | 16.00               |

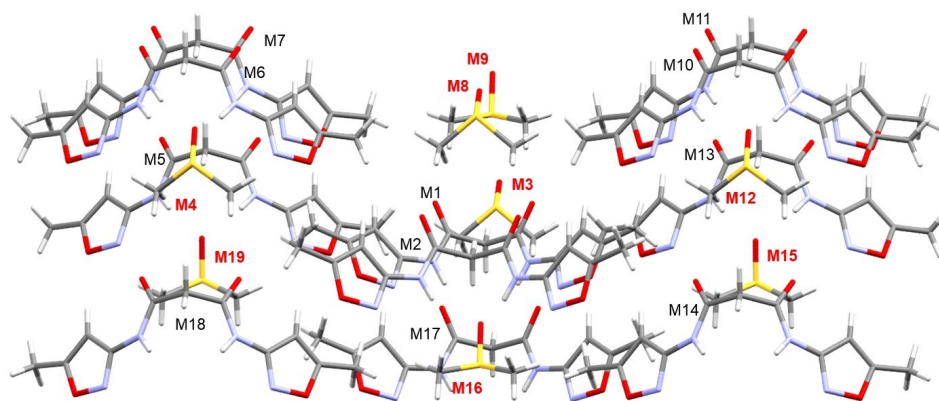

Fig. S3 Supramolecular cluster of the compound **1III**.

Table S3. Topological and energetic data of each dimer from the supramolecular cluster of compound **1III**.

| Dimer    | Symmetry code     | $C_{M1 \cdots MN}$ ( $\text{\AA}^2$ ) | $G_{M1 \cdots MN}$ ( $\text{kcal mol}^{-1}$ ) | $NC_{M1 \cdots MN}$ | $NG_{M1 \cdots MN}$ |
|----------|-------------------|---------------------------------------|-----------------------------------------------|---------------------|---------------------|
| M1       | x,y,z             |                                       |                                               |                     |                     |
| M1...M2  | x,y,z             | 52.63                                 | -9.94                                         | 2.89                | 2.25                |
| M1...M3  | x,1+y,z           | 10.85                                 | -0.11                                         | 0.60                | 0.03                |
| M1...M4  | 1,5-x,1-y,1/2+z   | 10.79                                 | -0.24                                         | 0.59                | 0.05                |
| M1...M5  | 1/2+x,1-y,-1/2+z  | 22.12                                 | -3.48                                         | 1.21                | 0.79                |
| M1...M6  | 1,5-x,-y,-1/2+z   | 9.63                                  | -1.83                                         | 0.53                | 0.41                |
| M1...M7  | 1,5-x,1-y,-1/2+z  | 15.41                                 | -4.31                                         | 0.85                | 0.98                |
| M1...M8  | x,y,z             | 21.74                                 | -3.55                                         | 1.19                | 0.80                |
| M1...M9  | x,y,z             | 15.92                                 | -4.43                                         | 0.87                | 1.00                |
| M1...M10 | 1/2-x,-y,-1/2+z   | 9.63                                  | -1.83                                         | 0.53                | 0.41                |
| M1...M11 | 1/2-x,1-y,-1/2+z  | 15.41                                 | -4.31                                         | 0.85                | 0.98                |
| M1...M12 | 1/2-x,1-y,1/2+z   | 10.79                                 | -0.24                                         | 0.59                | 0.05                |
| M1...M13 | -1/2+x,1-y,-1/2+z | 22.12                                 | -3.48                                         | 1.21                | 0.79                |
| M1...M14 | -1/2+x,1-y,1/2+z  | 15.41                                 | -4.31                                         | 0.85                | 0.98                |
| M1...M15 | 1/2-x,1-y,1/2+z   | 6.98                                  | -1.14                                         | 0.38                | 0.26                |
| M1...M16 | x,y,1+z           | 25.41                                 | -20.23                                        | 1.39                | 4.57                |
| M1...M17 | x,1+y,z           | 40.8                                  | -10.73                                        | 2.24                | 2.43                |
| M1...M18 | 1,5-x,1-y,1/2+z   | 15.41                                 | -4.31                                         | 0.85                | 0.98                |
| M1...M19 | 1,5-x,1-y,1/2+z   | 6.98                                  | -1.14                                         | 0.38                | 0.26                |
| Total    |                   | 328.03                                | -79.61                                        | 18.00               | 18.00               |

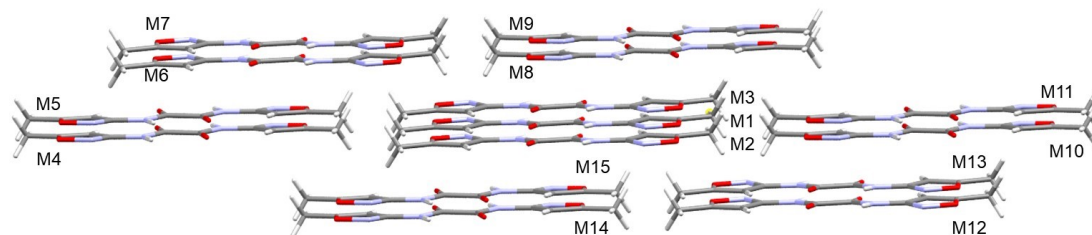

Fig. S4. Supramolecular cluster of the compound **2**.

Table S4. Topological and energetic data of each dimer from the supramolecular cluster of compound **2**.

| Dimer           | Symmetry code       | $C_{M1 \cdots MN}$ ( $\text{\AA}^2$ ) | $G_{M1 \cdots MN}$ ( $\text{kcal mol}^{-1}$ ) | $NC_{M1 \cdots MN}$ | $NG_{M1 \cdots MN}$ |
|-----------------|---------------------|---------------------------------------|-----------------------------------------------|---------------------|---------------------|
| M1              | $x,y,z$             |                                       |                                               |                     |                     |
| M1 $\cdots$ M2  | $1-x,-y,-z$         | 35.7                                  | -9.25                                         | 1.63                | 2.02                |
| M1 $\cdots$ M3  | $x,1+y,z$           | 35.7                                  | -9.25                                         | 1.63                | 2.02                |
| M1 $\cdots$ M4  | $-1+x,1/2-y,-1,5+z$ | 12.02                                 | -0.83                                         | 0.55                | 0.18                |
| M1 $\cdots$ M5  | $-1+x,1,5-y,-1,5+z$ | 12.02                                 | -0.83                                         | 0.55                | 0.18                |
| M1 $\cdots$ M6  | $-1+x,-1+y,-1+z$    | 0.11                                  | -0.38                                         | 0.01                | 0.08                |
| M1 $\cdots$ M7  | $-1+x,y,-1+z$       | 21.18                                 | -4.22                                         | 0.97                | 0.92                |
| M1 $\cdots$ M8  | $1-x,-1/2+y,1/2-z$  | 36.06                                 | -8.27                                         | 1.65                | 1.81                |
| M1 $\cdots$ M9  | $x,1,5-y,1/2+z$     | 36.06                                 | -8.27                                         | 1.65                | 1.81                |
| M1 $\cdots$ M10 | $2-x,-1/2+y,1,5-z$  | 12.02                                 | -0.83                                         | 0.55                | 0.18                |
| M1 $\cdots$ M11 | $2-x,1/2+y,1,5-z$   | 12.02                                 | -0.83                                         | 0.55                | 0.18                |
| M1 $\cdots$ M12 | $2-x,1-y,1-z$       | 21.18                                 | -4.22                                         | 0.97                | 0.92                |
| M1 $\cdots$ M13 | $2-x,2-y,1-z$       | 0.11                                  | -0.38                                         | 0.01                | 0.08                |
| M1 $\cdots$ M14 | $x,1/2-y,-1/2+z$    | 36.06                                 | -8.28                                         | 1.65                | 1.81                |
| M1 $\cdots$ M15 | $x,1,5-y,-1/2+z$    | 36.06                                 | -8.28                                         | 1.65                | 1.81                |
| Total           |                     | 306.30                                | -64.14                                        | 14.00               | 14.00               |

Table S5. QTAIM analysis and intramolecular interactions data for compounds **1** and **2**.

| <b>II</b>       |                            |                |            |         |          |          |          |                                                        |
|-----------------|----------------------------|----------------|------------|---------|----------|----------|----------|--------------------------------------------------------|
| Atoms           | $\rho_{\text{int}}$ (a.u.) | $\nabla^2\rho$ | $\epsilon$ | K       | V        | G        | BPL      | $G_{\text{AI}(X \cdots Y)}$ ( $\text{kcal mol}^{-1}$ ) |
| O3 $\cdots$ H12 | 0.010626                   | 0.04485        | 1.097157   | 0.00182 | -0.00756 | 0.009388 | 5.467346 | -1.76                                                  |
| O1 $\cdots$ H25 | 0.012281                   | 0.050695       | 0.607466   | 0.00178 | -0.00911 | 0.01089  | 5.101537 | -2.03                                                  |

|         |          |         |         |         |          |          |          |       |
|---------|----------|---------|---------|---------|----------|----------|----------|-------|
| O1...H9 | 0.01722  | 0.06115 | 0.19791 | 0.00071 | -0.01387 | 0.014579 | 4.344413 | -2.86 |
| Total   | 0.040127 |         |         |         |          |          |          | -6.65 |

III

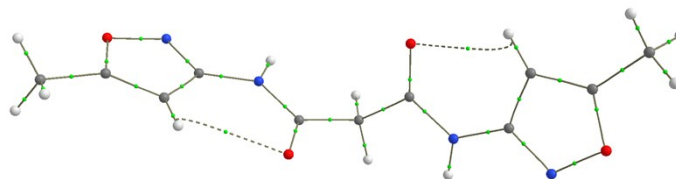

| Atoms     | $\rho_{\text{int}}$ (a.u.) | $\nabla^2\rho$ | $\epsilon$ | K       | V        | G        | BPL      | $G_{\text{AI}(X\cdots Y)}$<br>(kcal mol <sup>-1</sup> ) |
|-----------|----------------------------|----------------|------------|---------|----------|----------|----------|---------------------------------------------------------|
| O17...H27 | 0.012146                   | 0.050156       | 0.680682   | 0.00179 | -0.00895 | 0.010746 | 5.149239 | -2.01                                                   |
| O1...H11  | 0.012147                   | 0.050156       | 0.680365   | 0.00179 | -0.00895 | 0.010747 | 5.148992 | -2.01                                                   |
| Total     | 0.024293                   |                |            |         |          |          |          | -4.02                                                   |

III

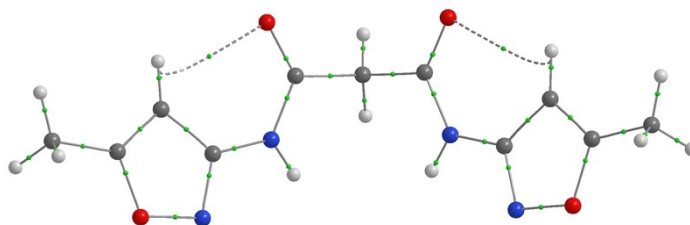

| Atoms     | $\rho_{\text{int}}$ (a.u.) | $\nabla^2\rho$ | $\epsilon$ | K       | V       | G        | BPL      | $G_{\text{AI}(X\cdots Y)}$<br>(kcal mol <sup>-1</sup> ) |
|-----------|----------------------------|----------------|------------|---------|---------|----------|----------|---------------------------------------------------------|
| O1...H11  | 0.011681                   | 0.048214       | 0.769936   | 0.00178 | -0.0085 | 0.010275 | 5.232394 | -1.93                                                   |
| O18...H28 | 0.011681                   | 0.048214       | 0.769936   | 0.00178 | -0.0085 | 0.010275 | 5.232394 | -1.93                                                   |
| Total     | 0.023362                   |                |            |         |         |          |          | -3.86                                                   |

2

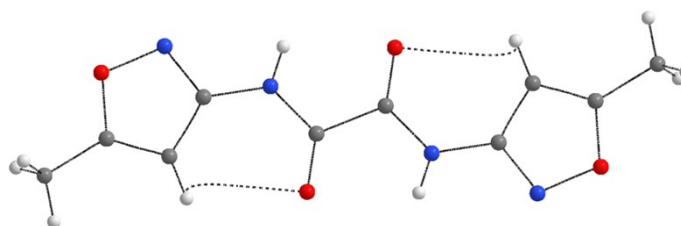

| Atoms    | $\rho_{\text{int}}$ (a.u.) | $\nabla^2\rho$ | $\epsilon$ | K         | V         | G        | BPL     | $G_{\text{AI}(X\cdots Y)}$<br>(kcal mol <sup>-1</sup> ) |
|----------|----------------------------|----------------|------------|-----------|-----------|----------|---------|---------------------------------------------------------|
| H4...O71 | 0.012261                   | 0.04999        | 0.484268   | -0.001694 | -0.009109 | 0.010803 | 4.98478 | -2.03                                                   |
| H4...O71 | 0.012261                   | 0.04999        | 0.484268   | -0.001694 | -0.009109 | 0.010803 | 4.98478 | -2.03                                                   |
| Total    | 0.024522                   |                |            |           |           |          |         | -4.06                                                   |

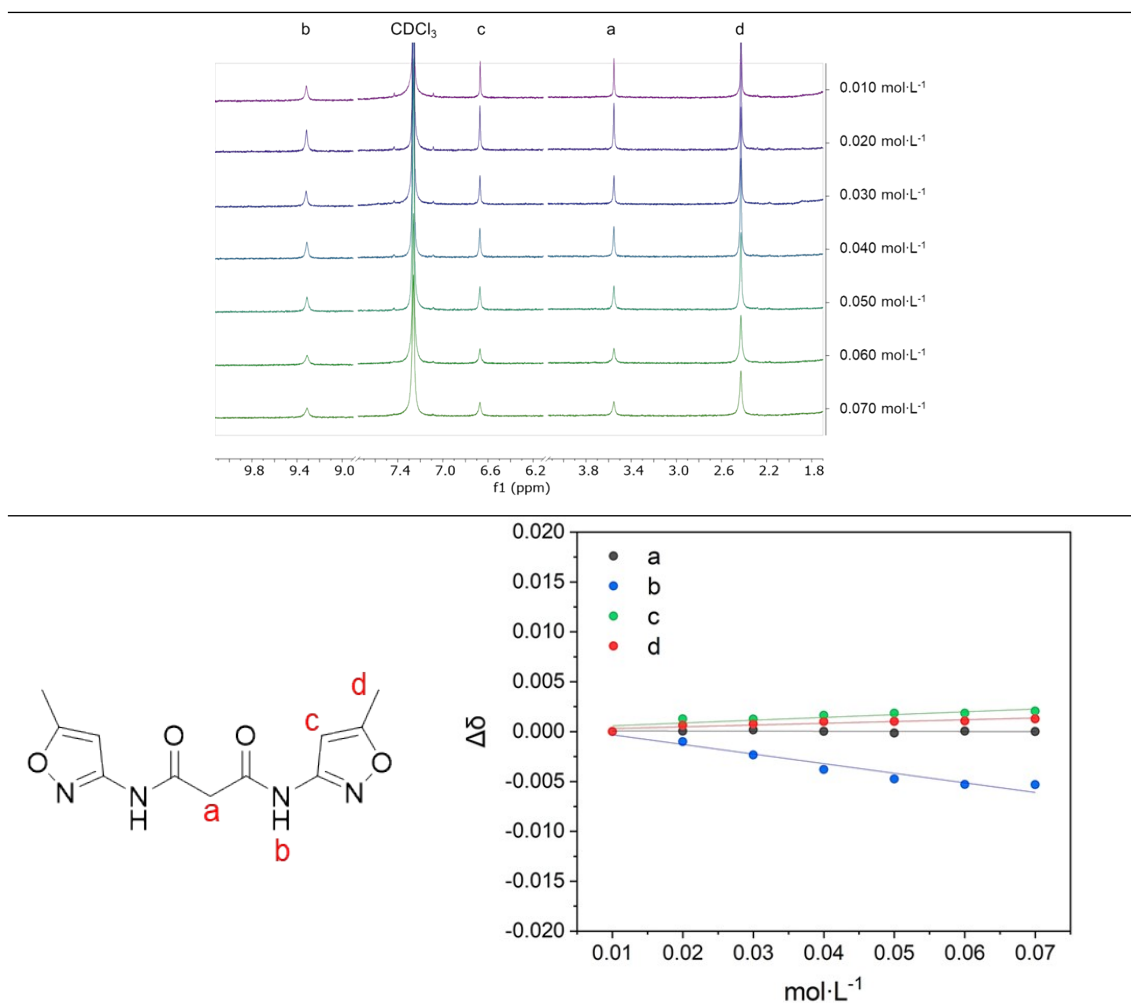

Fig. S5. Concentration-dependent  $^1\text{H}$  NMR experiments performed in  $\text{CDCl}_3$  at 298 K (top) and correlation between concentration and  $\Delta\delta$  for **1** (down).

Table S6. Linear equations based on the graphics of  $\Delta\delta$  as a function of concentration for the  $^1\text{H}$  NMR signals of compound **1**.

| Hydrogen | Linear Equation           | $R^2$  |
|----------|---------------------------|--------|
| NH(b)    | $y = -0.09624x - 0.00063$ | 0.9452 |
| CH(a)    | $y = -0.00010x + 0.00007$ | 0.0622 |
| CH(c)    | $y = 0.01769x - 0.00012$  | 0.8305 |
| CH(d)    | $y = 0.02805x + 0.00029$  | 0.7714 |

Table S7. Energies obtained from the fragmentation via QTAIM ( $G_{\text{AI}(X\cdots Y)}$ ), sum of the cluster contribution ( $\sum G_{\text{AI}(X\cdots Y)}$ ), number of contacts, normalized  $G_{\text{AI}}$ , and the average value of  $G_{\text{AI}}$ .

| Form II                |              |               |            |            |            |             |           |           |                    |                |            |
|------------------------|--------------|---------------|------------|------------|------------|-------------|-----------|-----------|--------------------|----------------|------------|
| Interactio<br>n        | NH...O=<br>C | O...<br>$\pi$ | CH...<br>O | N... $\pi$ | CH...<br>N | CH...H<br>C | N...<br>O | O...<br>O | $\pi$ ...<br>$\pi$ | CH...<br>$\pi$ | NH...<br>N |
|                        | -3.24        | -0.93         | -1.13      | -1.25      | -2.03      | -0.76       | -1.15     | -1.55     | -                  | -0.95          | -7.72      |
|                        | -3.24        | -0.93         | -1.13      | -1.25      | -2.03      | 0.02        | -1.15     |           | -                  | -0.95          | -7.72      |
|                        |              |               | -2.42      | -2.12      |            | -0.12       | -1.84     |           |                    |                |            |
|                        |              |               | -2.42      | -2.12      |            | -1.37       | -1.84     |           |                    |                |            |
|                        |              |               | -0.23      | -1.69      |            | -0.67       |           |           |                    |                |            |
|                        |              |               | -0.45      | -1.69      |            | -0.67       |           |           |                    |                |            |
|                        |              |               | -0.45      |            |            | -0.41       |           |           |                    |                |            |
|                        |              |               | -0.45      |            |            | -0.76       |           |           |                    |                |            |
|                        |              |               | -0.45      |            |            | 0.02        |           |           |                    |                |            |
|                        |              |               | -0.23      |            |            | -0.59       |           |           |                    |                |            |
|                        |              |               | -0.86      |            |            |             |           |           |                    |                |            |
|                        |              |               | -0.86      |            |            |             |           |           |                    |                |            |
|                        |              |               | -1.07      |            |            |             |           |           |                    |                |            |
|                        |              |               | -1.07      |            |            |             |           |           |                    |                |            |
|                        |              |               | -1.40      |            |            |             |           |           |                    |                |            |
|                        |              |               | -1.40      |            |            |             |           |           |                    |                |            |
|                        |              |               | -1.60      |            |            |             |           |           |                    |                |            |
|                        |              |               | -1.60      |            |            |             |           |           |                    |                |            |
| $\Sigma G_{AI(X...Y)}$ | -6.49        | -1.87         | -19.22     | -          | -4.06      | -5.31       | -5.98     | -1.55     | -                  | -1.90          | -15.43     |
| Contacts               | 2            | 2             | 18         | 6          | 2          | 10          | 4         | 1         | 2                  | 2              | 2          |
| $NG_{AI(X...Y)}$       | 4.43         | 1.27          | 13.12      | 6.91       | 2.77       | 3.63        | 4.08      | 1.06      | 1.91               | 1.30           | 10.53      |
| $G_{AI(X...Y)_{av}}$   | -3.24        | -0.93         | -1.07      | -1.69      | -2.03      | -0.53       | -1.50     | -1.55     | -                  | -0.95          | -7.72      |
|                        |              |               |            |            |            |             |           |           | 1.40               |                |            |
| Form III               |              |               |            |            |            |             |           |           |                    |                |            |
| Interactio<br>n        | O... $\pi$   | CH...O        | N... $\pi$ | CH...HC    | O...O      | NH...N      | N...N     |           |                    |                |            |
|                        | -2.25        | -1.74         | -1.99      | -0.50      | -0.38      | -7.24       | -0.59     |           |                    |                |            |
|                        | -2.25        | -1.74         | -1.99      | -0.29      | -0.38      | -7.24       | -0.59     |           |                    |                |            |
|                        | -2.25        | -1.74         | -1.99      | -0.50      | -0.38      | -7.24       |           |           |                    |                |            |
|                        | -2.25        | -1.74         | -1.99      | -0.29      | -0.38      | -7.24       |           |           |                    |                |            |
|                        | -0.36        | -0.89         |            | -0.64      |            |             |           |           |                    |                |            |
|                        | -0.36        | -0.89         |            | -0.64      |            |             |           |           |                    |                |            |
|                        | -0.36        | -0.89         |            | -0.86      |            |             |           |           |                    |                |            |
|                        | -0.36        | -0.89         |            | -0.64      |            |             |           |           |                    |                |            |
|                        |              | -1.45         |            | -0.64      |            |             |           |           |                    |                |            |
|                        |              | -1.45         |            | -0.86      |            |             |           |           |                    |                |            |
|                        |              | -1.32         |            |            |            |             |           |           |                    |                |            |
|                        |              | -1.32         |            |            |            |             |           |           |                    |                |            |
|                        |              | -1.32         |            |            |            |             |           |           |                    |                |            |
|                        |              | -1.32         |            |            |            |             |           |           |                    |                |            |
|                        |              | -1.45         |            |            |            |             |           |           |                    |                |            |
|                        |              | -1.45         |            |            |            |             |           |           |                    |                |            |
|                        |              | -0.28         |            |            |            |             |           |           |                    |                |            |
|                        |              | -0.28         |            |            |            |             |           |           |                    |                |            |
|                        |              | -0.28         |            |            |            |             |           |           |                    |                |            |
|                        |              | -0.28         |            |            |            |             |           |           |                    |                |            |
| $\Sigma G_{AI(X...Y)}$ | -10.45       | -22.73        | -7.94      | -5.89      | -1.52      | -28.96      | -1.18     |           |                    |                |            |
| Contacts               | 8            | 20            | 4          | 10         | 4          | 4           | 2         |           |                    |                |            |
| $NG_{AI(X...Y)}$       | 6.91         | 15.03         | 5.25       | 3.89       | 1.00       | 19.15       | 0.78      |           |                    |                |            |
| $G_{AI(X...Y)_{av}}$   | -1.31        | -1.14         | -1.99      | -0.59      | -0.38      | -7.24       | -0.59     |           |                    |                |            |





| Form <b>IIII</b> (M1...MN) |          |            |        |            |        |         |             |
|----------------------------|----------|------------|--------|------------|--------|---------|-------------|
| Interaction                | NH...O=S | O... $\pi$ | CH...O | N... $\pi$ | CH...N | CH...HC | CH... $\pi$ |
| Energy                     | -7.50    | -0.98      | -1.62  | -1.77      | -1.11  | -0.24   | -1.12       |
| Gai                        | -7.50    | -0.98      | -0.75  | -1.77      | -1.11  | -0.53   | -1.12       |
|                            |          | -1.86      | -0.25  | -1.04      | -1.68  | -0.55   |             |
|                            |          | -1.86      | -0.64  | -1.04      | -1.68  | -0.53   |             |
|                            |          |            | -1.74  |            | -1.68  | -0.55   |             |
|                            |          |            | -1.78  |            | -1.45  | -0.24   |             |
|                            |          |            | -1.78  |            | -1.45  | -1.14   |             |
|                            |          |            | -2.22  |            | -0.81  | -1.14   |             |
|                            |          |            | -2.22  |            | -0.81  |         |             |
|                            |          |            | -0.75  |            | -1.68  |         |             |
|                            |          |            | -0.25  |            |        |         |             |
|                            |          |            | -0.64  |            |        |         |             |
| $G_{AI(X...Y)}$            |          |            | -1.74  |            |        |         |             |
|                            |          |            | -1.62  |            |        |         |             |
|                            |          |            | -0.25  |            |        |         |             |
|                            |          |            | -0.64  |            |        |         |             |
|                            |          |            | -1.74  |            |        |         |             |
|                            |          |            | -2.32  |            |        |         |             |
|                            |          |            | -1.52  |            |        |         |             |
|                            |          |            | -1.52  |            |        |         |             |
|                            |          |            | -2.00  |            |        |         |             |
|                            |          |            | -2.00  |            |        |         |             |
|                            |          |            | -0.25  |            |        |         |             |
|                            |          |            | -0.64  |            |        |         |             |
|                            |          |            | -1.74  |            |        |         |             |
| $\Sigma G_{AI(X...Y)}$     | -15.00   | -5.68      | -32.59 | -5.61      | -13.46 | -4.93   | -2.23       |
| Contacts                   | 2        | 4          | 25     | 4          | 10     | 8       | 2           |
| $NG_{AI(X...Y)}$           | 10.36    | 3.92       | 22.52  | 3.87       | 9.30   | 3.40    | 1.54        |
| $G_{AI(X...Y)_{av}}$       | -7.50    | -1.42      | -1.30  | -1.40      | -1.35  | -0.62   | -1.12       |

  

| Form <b>IIII</b> (M1...S) |          |        |        |         |
|---------------------------|----------|--------|--------|---------|
| Interaction               | NH...O=S | CH...O | CH...N | CH...HC |
|                           | -7.50    | -1.78  | -1.45  | -0.24   |
|                           | -7.50    | -1.78  | -1.45  | -0.24   |
| $G_{AI(X...Y)}$           |          | -2.22  |        | -1.14   |
|                           |          | -2.22  |        | -1.14   |
|                           |          | -2.32  |        |         |
| $\Sigma G_{AI(X...Y)}$    | -15.00   | -10.30 | -2.91  | -2.76   |
| Contacts                  | 2        | 5      | 2      | 4       |
| $NG_{AI(X...Y)}$          | 6.30     | 4.32   | 1.22   | 1.16    |
| $G_{AI(X...Y)_{av}}$      | -7.50    | -2.06  | -1.45  | -0.69   |
